# Supplementary material for: Comparative transcriptome analysis of R3a and Avr3a-mediated defense responses in transgenic tomato
Source: PeerJ. 2021 Aug 9;9:e11965. doi: 10.7717/peerj.11965 (PMC8359799; doi:10.7717/peerj.11965)
Supplement: Supplemental Information 9 [file peerj-09-11965-s009.xlsx]

## Sheet: Sheet1
	Table S2. Basic statistical of RNA-sequencing data
	Sample ID	Paired-end Clean reads	Clean base (Gb)	GC (%)	Q20 (%)	Q30 (%)	Mapped Reads	Uniq Mapped Reads
	A3a-0h1	23044127	6.89	43.43	97.9	94.05	44,690,635 (96.97%)	42,757,184 (92.77%)
	A3a-0h2	25575629	7.64	43.57	97.88	94.12	49,687,467 (97.14%)	47,472,257 (92.81%)
	A3a-0h3	24515404	7.33	43.82	97.8	93.83	47,695,429 (97.28%)	45,696,981 (93.20%)
	A3a-2h1	21543404	6.45	43.24	97.64	93.63	41,349,187 (95.97%)	39,884,570 (92.57%)
	A3a-2h2	22232272	6.64	43.46	97.79	93.94	42,980,449 (96.66%)	41,549,953 (93.45%)
	A3a-2h3	21548076	6.45	43.46	97.99	94.26	41,739,696 (96.85%)	40,382,482 (93.70%)
	A3a-6h1	24221871	7.25	42.89	98.08	94.5	47,016,318 (97.05%)	45,249,378 (93.41%)
	A3a-6h2	22295052	6.67	43.18	98.13	94.52	42,215,795 (94.68%)	40,705,992 (91.29%)
	A3a-6h3	21984203	6.57	43.27	97.88	94.12	42,541,361 (96.75%)	40,955,155 (93.15%)
	R-A3a-0h1	20211076	6.04	44.16	97.87	94.11	39,156,907 (96.87%)	37,082,555 (91.74%)
	R-A3a-0h2	21662913	6.49	44.01	98.18	94.69	42,068,045 (97.10%)	39,959,668 (92.23%)
	R-A3a-0h3	23400929	7	43.91	97.87	94.1	45,151,911 (96.47%)	42,757,857 (91.36%)
	R-A3a-2h1	21997972	6.58	42.54	97.91	94.12	42,606,049 (96.84%)	40,546,205 (92.16%)
	R-A3a-2h2	22128281	6.62	42.47	97.98	94.2	42,973,078 (97.10%)	41,087,678 (92.84%)
	R-A3a-2h3	21927780	6.55	42.74	97.83	93.97	42,011,910 (95.80%)	40,073,781 (91.38%)
	R-A3a-6h1	21634656	6.47	42.67	97.65	93.56	41,720,586 (96.42%)	40,509,811 (93.62%)
	R-A3a-6h2	21710980	6.49	42.63	97.95	94.17	41,732,081 (96.11%)	40,461,372 (93.18%)
	R-A3a-6h3	27869453	8.32	42.89	97.91	94.11	53,745,886 (96.42%)	52,100,258 (93.47%)
	MM-0h1	28257330	8.44	43.36	98.03	94.31	55,102,013 (97.50%)	53,032,944 (93.84%)
	MM-0h2	23102723	6.91	43.43	97.94	94.14	45,067,112 (97.54%)	43,466,422 (94.07%)
	MM-0h3	24985464	7.47	43.37	97.99	94.2	48,807,068 (97.67%)	47,063,422 (94.18%)
	Notes:MM, Moneymaker; R-A3a,MM-R3a-Avr3a; A3a, MM-Avr3a.
