# Supplementary material for: Comparative transcriptome analysis of R3a and Avr3a-mediated defense responses in transgenic tomato
Source: PeerJ. 2021 Aug 9;9:e11965. doi: 10.7717/peerj.11965 (PMC8359799; doi:10.7717/peerj.11965)
Supplement: Supplemental Information 11 [file peerj-09-11965-s011.xlsx]

## Sheet: Sheet1
		Table S4. The statistical of differentially expressed genes at each time-point between different samples
		DEG Set	DEG Number	up-regulated	down-regulated
		A3a-0h1_A3a-0h2_A3a-0h3_vs_A3a-2h1_A3a-2h2_A3a-2h3	4217	1909	2308
		A3a-0h1_A3a-0h2_A3a-0h3_vs_A3a-6h1_A3a-6h2_A3a-6h3	2115	1242	873
		A3a-0h1_A3a-0h2_A3a-0h3_vs_R-A3a-0h1_R-A3a-0h2_R-A3a-0h3	1506	869	637
		A3a-2h1_A3a-2h2_A3a-2h3_vs_A3a-6h1_A3a-6h2_A3a-6h3	3124	1656	1468
		A3a-2h1_A3a-2h2_A3a-2h3_vs_R-A3a-2h1_R-A3a-2h2_R-A3a-2h3	8470	4549	3921
		A3a-6h1_A3a-6h2_A3a-6h3_vs_R-A3a-6h1_R-A3a-6h2_R-A3a-6h3	11379	5283	6096
		MM-0h1_MM-0h2_MM-0h3_vs_A3a-0h1_A3a-0h2_A3a-0h3	396	147	249
		MM-0h1_MM-0h2_MM-0h3_vs_R-A3a-0h1_R-A3a-0h2_R-A3a-0h3	2416	1431	985
		R-A3a-0h1_R-A3a-0h2_R-A3a-0h3_vs_R-A3a-2h1_R-A3a-2h2_R-A3a-2h3	9779	4969	4810
		R-A3a-0h1_R-A3a-0h2_R-A3a-0h3_vs_R-A3a-6h1_R-A3a-6h2_R-A3a-6h3	11248	5252	5996
		R-A3a-2h1_R-A3a-2h2_R-A3a-2h3_vs_R-A3a-6h1_R-A3a-6h2_R-A3a-6h3	8146	3615	4531
		Notes: DEG Set, the gene set obtained by differential expression analysis between different groups; DEG Number, the number of DEGs; up-regulated,the numberof up-regulated genes; down-regulated,the numberof down-regulated genes.
