# Supplementary material for: Comparative transcriptome analysis of R3a and Avr3a-mediated defense responses in transgenic tomato
Source: PeerJ. 2021 Aug 9;9:e11965. doi: 10.7717/peerj.11965 (PMC8359799; doi:10.7717/peerj.11965)
Supplement: Supplemental Information 12 [file peerj-09-11965-s012.xlsx]

## Sheet: Sheet1
		Table S5. Functional annotation statistical results of DEGs
		DEG Set	Total	COG	GO	KEGG	KOG	NR	Pfam	Swiss-Prot	eggNOG
		A3a-0h1_A3a-0h2_A3a-0h3_vs_A3a-2h1_A3a-2h2_A3a-2h3	4141	1901	3187	1528	2060	4102	3546	3344	3795
		A3a-0h1_A3a-0h2_A3a-0h3_vs_A3a-6h1_A3a-6h2_A3a-6h3	2061	917	1568	779	1058	2042	1786	1691	1854
		A3a-0h1_A3a-0h2_A3a-0h3_vs_R-A3a-0h1_R-A3a-0h2_R-A3a-0h3	1467	605	1068	568	876	1465	1258	1167	1344
		A3a-2h1_A3a-2h2_A3a-2h3_vs_A3a-6h1_A3a-6h2_A3a-6h3	3037	1445	2319	1273	1722	3018	2602	2398	2778
		A3a-2h1_A3a-2h2_A3a-2h3_vs_R-A3a-2h1_R-A3a-2h2_R-A3a-2h3	8286	3344	6150	3104	4529	8212	7081	6452	7607
		A3a-6h1_A3a-6h2_A3a-6h3_vs_R-A3a-6h1_R-A3a-6h2_R-A3a-6h3	11121	4804	8405	4577	6224	11037	9559	8729	10237
		MM-0h1_MM-0h2_MM-0h3_vs_A3a-0h1_A3a-0h2_A3a-0h3	389	189	297	136	190	382	344	326	337
		MM-0h1_MM-0h2_MM-0h3_vs_R-A3a-0h1_R-A3a-0h2_R-A3a-0h3	2355	1013	1737	921	1336	2344	2009	1875	2151
		R-A3a-0h1_R-A3a-0h2_R-A3a-0h3_vs_R-A3a-2h1_R-A3a-2h2_R-A3a-2h3	9542	3917	7164	3587	5122	9461	8133	7467	8741
		R-A3a-0h1_R-A3a-0h2_R-A3a-0h3_vs_R-A3a-6h1_R-A3a-6h2_R-A3a-6h3	11006	4755	8297	4466	6141	10916	9464	8656	10149
		R-A3a-2h1_R-A3a-2h2_R-A3a-2h3_vs_R-A3a-6h1_R-A3a-6h2_R-A3a-6h3	7985	3565	6087	3319	4541	7915	6940	6362	7384
		Notes: DEG Set, the gene set obtained by differential expression analysis between different groups; COG, Cluster of Orthologous Groups genes Database; GO, Gene Ontology; KEGG, Kyoto Encyclopedia of Genes and Genomes; KOG, Clusters of orthologous groups for eukaryotic complete genomes; NR, NCBINR database; Pfam, the Pfam database; Swiss-Prot, the Swiss-Prot database; eggnog, Evolutionary Genealogy…
