# Supplementary material for: Comparative transcriptome analysis of R3a and Avr3a-mediated defense responses in transgenic tomato
Source: PeerJ. 2021 Aug 9;9:e11965. doi: 10.7717/peerj.11965 (PMC8359799; doi:10.7717/peerj.11965)
Supplement: Supplemental Information 16 [file peerj-09-11965-s016.xls]

## Sheet: Fv-Fm
	Raw data for Figure 2
		Fv
		MM-Avr3a-0h	MM-Avr3a-2h	MM-Avr3a-4h	MM-Avr3a-6h	MM-Avr3a-8h	MM-R3a-Avr3a-0h	MM-R3a-Avr3a-4h	MM-R3a-Avr3a-4h	MM-R3a-Avr3a-6h	MM-R3a-Avr3a-8h
		422.03	390.47	416.44	403.19	404.75	346.61	239.94	264.1	9.8	4.41
		420.43	396.4	408.74	408.76	398.24	344	223.31	267.9	9.67	4.03
		417.11	402.27	414.67	414.74	405.4	341.29	231.63	260.34	9.91	4.21
	average	419.857	396.38	413.283	408.897	402.797	343.967	231.627	264.113	9.79333	4.21667
		Fm
		MM-Avr3a-0h	MM-Avr3a-2h	MM-Avr3a-4h	MM-Avr3a-6h	MM-Avr3a-8h	MM-R3a-Avr3a-0h	MM-R3a-Avr3a-4h	MM-R3a-Avr3a-4h	MM-R3a-Avr3a-6h	MM-R3a-Avr3a-8h
		550.46	532.76	533.35	528.96	530.1	553.47	399.1	500.13	40.96	35.21
		552.71	538.15	540.43	535.01	528.16	564.27	394.58	518.44	33.9	37.67
		548.19	527.39	536.9	543.93	532	558.86	390.05	509.29	37.42	36.94
	average	550.453	532.767	536.893	535.967	530.087	558.867	394.577	509.287	37.4267	36.6067
stdev	Fv	2.50961	5.90003	4.03294	5.77621	3.95955	2.66016	8.315	3.78002	0.120139	0.190088
stdev	Fm	2.26001	5.38	3.54	7.53071	1.92003	5.4	4.525	9.155	3.53	1.26342
		MM-Avr3a-0h	MM-Avr3a-2h	MM-Avr3a-4h	MM-Avr3a-6h	MM-Avr3a-8h	MM-R3a-Avr3a-0h	MM-R3a-Avr3a-4h	MM-R3a-Avr3a-4h	MM-R3a-Avr3a-6h	MM-R3a-Avr3a-8h
Average Rio	Fv/Fm	0.762747	0.744003	0.769768	0.762914	0.759869	0.615472	0.587026	0.518595	0.261667	0.115188
			MM-Avr3a	MM-R3a-Avr3a		MM-Avr3a	MM-R3a-Avr3a
		0h	0.762752	0.615438		0.00262254	0.00757112
		2h	0.74398	0.587024		0.0131444	0.0101422
		4h	0.769773	0.518609		0.0086539	0.0118442
		6h	0.762914	0.261555		0.00372295	0.0198861
		8h	0.759879	0.11528		0.00435783	0.00571083
